# Supplementary material
Source: ML conference proceedings conference paper supplement (https://proceedings.mlr.press/v161/troop21a.html)
Supplement: Supplementary file [file troop21a-supp.pdf]

---

# Bias-Corrected Peaks-Over-Threshold Estimation of the CVaR (Supplementary Material)

---

Dylan Troop<sup>1</sup>

Frédéric Godin<sup>2</sup>

Jia Yuan Yu<sup>3</sup>

<sup>1</sup>Department of Computer Science and Software Engineering, Concordia University, Montreal, Canada

<sup>2</sup>Department of Mathematics and Statistics, Concordia University, Montreal, Canada

<sup>3</sup>Concordia Institute for Information Systems Engineering, Concordia University, Montreal, Canada

## A PROOFS

We first recall the stochastic order notation (e.g., Vaart [1998, Section 2.2]), which will be used throughout subsequent proofs.

**Definition A.1** (Stochastic  $o$  and  $O$  symbols). *Let  $X_n, R_n$  denote sequences of random variables. Then,*

$$\begin{aligned} X_n = o_p(R_n) & \text{ means } \forall \varepsilon > 0, \lim_{n \rightarrow \infty} \mathbb{P}(|X_n/R_n| > \varepsilon) = 0, \\ X_n = O_p(R_n) & \text{ means } \forall \varepsilon > 0, \exists M, N > 0, \forall n > N, \mathbb{P}(|X_n/R_n| > M) < \varepsilon. \end{aligned}$$

*The often used notation  $X_n = o_p(1)$  means that  $X_n$  converges to zero in probability, and  $X_n = O_p(1)$  means that  $X_n$  is bounded in probability.*

### A.1 PROOF OF THEOREM 3.1

We first state the following lemma, which is equivalent to Beirlant et al. [2003, Proposition 1] with different notation.

**Lemma A.1.** *Suppose assumption 2.1 and assumption 2.2 hold. Then  $\forall \varepsilon > 0, \exists t_0, \forall t, x$  such that  $t \geq t_0$  and  $tx \geq t_0$ ,*

$$(1 - \varepsilon)e^{-\varepsilon|\log x|} \leq \left[ \frac{U(tx) - U(t)}{a(t)} - \frac{x^\xi - 1}{\xi} \right] / [A(t) I_{\xi, \rho}(x)] \leq (1 + \varepsilon)e^{\varepsilon|\log x|}, \quad (1)$$

where

$$A(t) = \frac{tU''(t)}{U'(t)} - \xi + 1 \quad \text{and} \quad I_{\xi, \rho}(x) = \begin{cases} \frac{1}{\rho} \left( \frac{x^{\xi+\rho} - 1}{\xi + \rho} - \frac{x^\xi - 1}{\xi} \right), & \rho < 0, \xi + \rho \neq 0, \\ \frac{1}{\rho} \left( \log x - \frac{x^\xi - 1}{\xi} \right), & \rho < 0, \xi + \rho = 0, \\ \frac{1}{\xi} \left( x^\xi \log x - \frac{x^\xi - 1}{\xi} \right), & \rho = 0. \end{cases}$$

*Proof.* In Beirlant et al. [2003], the statement is given as  $\forall \varepsilon > 0, \exists t_0, \forall t, x$  such that  $t \geq t_0$  and  $t + x \geq t_0$ ,

$$(1 - \varepsilon)e^{-\varepsilon|x|} \leq \left[ \frac{V(t+x) - V(t)}{V'(t)} - \frac{e^{\xi x} - 1}{\xi} \right] / [\tilde{A}(e^t) \tilde{I}_{\xi, \rho}(x)] \leq (1 + \varepsilon)e^{\varepsilon|x|}, \quad (2)$$

where

$$V(t) = (\bar{F})^{-1}(e^{-t}), \quad \tilde{A}(t) = \frac{V''(\log t)}{V'(\log t)} - \xi, \quad \tilde{I}_{\xi, \rho}(x) = I_{\xi, \rho}(e^x).$$

Then, for  $t \geq 1$ ,

$$V(\log t) = (\bar{F})^{-1}(1/t) = (1/\bar{F})^{-1}(t) = U(t),$$

and

$$V'(\log t) = tU'(t) = a(t), \quad V''(\log t) = t^2U''(t) + tU'(t) \Rightarrow \tilde{A}(t) = A(t).$$

Since  $\log$  is strictly increasing, eq. (2) holds with  $\log t$  and  $\log x$  where  $\log t \geq t_0$  and  $\log tx \geq t_0$ . Substituting expressions in eq. (2), we get eq. (1).  $\square$

The following corollary will also be used in the main proof of this section.

**Corollary A.1.** *An immediate consequence of lemma A.1 is for all  $x > 0$ ,*

$$\lim_{t \rightarrow \infty} \frac{\frac{U(tx) - U(t)}{a(t)} - \frac{x^\xi - 1}{\xi}}{A(t)} = I_{\xi, \rho}(x). \quad (3)$$

corollary A.1 can also be found in De Haan and Ferreira [2006, Theorem 2.3.12]. Before proving our main result of this section, we first recall the dominated convergence theorem which will be needed later.

**Theorem A.1** (Dominated convergence theorem). *Let  $\{f_n\}_{n=1}^\infty$  be a sequence of real-valued functions defined on  $S \subset \mathbb{R}$  such that  $\forall x \in S$ ,  $\lim_{n \rightarrow \infty} f_n(x) \rightarrow f(x)$ . If  $\forall x \in S$ ,  $n$ ,*

$$|f_n(x)| \leq g(x)$$

for some integrable (i.e., the integral is finite over  $S$ ) function  $g$ , then

$$\lim_{n \rightarrow \infty} \int_S f_n(x) dx = \int_S \lim_{n \rightarrow \infty} f_n(x) dx = \int_S f(x) dx.$$

**Proof of Theorem 3.1.** We use corollary A.1 to derive a convergence result for the approximation error of the VaR, i.e,  $q_\alpha - q_{u, \alpha}$ . Then, using lemma A.1 and theorem A.1, we will be able to derive the convergence of  $\epsilon_{u, \alpha}$ .

For any  $p \in (0, 1)$  and  $y \in \text{dom } F$  such that  $F(y) = p$ ,

$$\left(\frac{1}{\bar{F}}\right)(y) = \frac{1}{\bar{F}(y)} = \frac{1}{1-p},$$

which implies that

$$U\left(\frac{1}{1-p}\right) = \left(\frac{1}{\bar{F}}\right)^{-1}(1/(1-p)) = y.$$

Hence,

$$U(1/(1-\alpha)) = U(\tau_u \beta) = q_\alpha \quad \text{and} \quad U(\tau_u) = u.$$

Then, from the definition of  $q_{u, \alpha}$  we get

$$q_{u, \alpha} = u + \frac{\sigma(u)}{\xi} (\beta^\xi - 1) = U(\tau_u) + \frac{a(\tau_u)}{\xi} (\beta^\xi - 1).$$

Setting  $D_u(\beta) = (q_\alpha - q_{u, \alpha}) / (a(\tau_u)A(\tau_u))$ , it then follows from the previous two equations and corollary A.1 with  $t = \tau_u$ ,  $x = \beta$  that

$$D_u(\beta) = \frac{U(\tau_u \beta) - U(\tau_u) - \frac{a(\tau_u)}{\xi} (\beta^\xi - 1)}{a(\tau_u)A(\tau_u)} = \frac{\frac{U(\tau_u \beta) - U(\tau_u)}{a(\tau_u)} - \frac{\beta^\xi - 1}{\xi}}{A(\tau_u)} \rightarrow I_{\xi, \rho}(\beta) \quad \text{as } u \rightarrow \infty. \quad (4)$$

From the definition of the GPD approximation error and the CVaR, for a fixed  $u, \alpha$ ,

$$\frac{\epsilon_{u, \alpha}}{a(\tau_u)A(\tau_u)} = \frac{c_{u, \alpha} - c_\alpha}{a(\tau_u)A(\tau_u)} = -\frac{1}{1-\alpha} \int_\alpha^1 \frac{q_\gamma - q_{u, \gamma}}{a(\tau_u)A(\tau_u)} d\gamma = -\beta \int_\beta^\infty \frac{D_u(x)}{x^2} dx, \quad (5)$$

where  $D_u(x) = (q_\gamma - q_{u,\gamma})/(a(\tau_u)A(\tau_u))$  and we have used the substitution  $x = \bar{F}(u)/(1 - \gamma)$ . We now apply the dominated convergence theorem to get the limiting behaviour of eq. (5) as  $u \rightarrow \infty$ . From lemma A.1,  $\forall \varepsilon > 0$ ,  $\exists u_0$  such that  $\forall u \geq u_0$ ,  $x \in [\beta, \infty)$ ,

$$\left| \frac{D_u(x)}{x^2} \right| \leq (1 + \varepsilon)x^{\varepsilon-2}I_{\xi,\rho}(x).$$

$(1 + \varepsilon)x^{\varepsilon-2}I_{\xi,\rho}(x)$  is integrable over  $[\beta, \infty)$  as long as  $\varepsilon < 1 - \xi$ . Since  $\xi < 1$ , let  $\varepsilon = (1 - \xi)/2$ . Then theorem A.1 can be applied to  $D_u(x)/x^2$ . Setting  $K_{\xi,\rho}(\beta) = -\beta \int_{\beta}^{\infty} [I_{\xi,\rho}(x)/x^2] dx$ , it follows that

$$\begin{aligned} \lim_{u \rightarrow \infty} \frac{\epsilon_{u,\alpha}}{a(\tau_u)A(\tau_u)} &= \lim_{u \rightarrow \infty} -\beta \int_{\beta}^{\infty} \frac{D_u(x)}{x^2} dx \\ &= -\beta \int_{\beta}^{\infty} \lim_{u \rightarrow \infty} \frac{D_u(x)}{x^2} dx \\ &= -\beta \int_{\beta}^{\infty} \frac{I_{\xi,\rho}(x)}{x^2} dx \\ &= K_{\xi,\rho}(\beta), \end{aligned}$$

where the last integral can be computed explicitly to obtain eq. (8). □

## A.2 PROOF OF THEOREM 4.2

First recall Slutsky's lemma (see, for example, Vaart [1998, Lemma 2.8]).

**Lemma A.2** (Slutsky). *Let  $X_n$ ,  $X$ ,  $Y_n$  be random vectors or variables. If  $X_n \xrightarrow{d} X$  and  $Y_n \xrightarrow{p} c$  for a constant  $c$ , then*

- (i)  $X_n + Y_n \xrightarrow{d} X + c$ ;
- (ii)  $X_n Y_n \xrightarrow{d} Xc$ ;
- (iii)  $X_n/Y_n \xrightarrow{d} X/c$  provided  $c \neq 0$ .

**Proof of Theorem 4.2.** First note that since  $\hat{A}_n$  and  $\hat{b}_n$  are consistent, i.e.,

$$\frac{\hat{A}_n}{A(n/k)} \xrightarrow{p} 1, \quad \hat{b}_n \xrightarrow{p} b_{\xi,\rho},$$

then by lemma A.2, the fact that  $\hat{\sigma}_{\text{MLE}}^{(n)}/a(n/k) \xrightarrow{p} 1$  (which follows from theorem 4.1), and the assumption of theorem 4.1 that  $\lim_{n \rightarrow \infty} \sqrt{k}A(n/k) \rightarrow \lambda < \infty$ ,

$$\begin{aligned} \sqrt{k}\hat{A}_n \left( \hat{b}_n^{(1)}, \frac{\hat{\sigma}_{\text{MLE}}^{(n)}}{a(n/k)} \hat{b}_n^{(2)} \right) &= \sqrt{k}A(n/k) \frac{\hat{A}_n}{A(n/k)} \left( \hat{b}_n^{(1)}, \frac{\hat{\sigma}_{\text{MLE}}^{(n)}}{a(n/k)} \hat{b}_n^{(2)} \right) \\ &\xrightarrow{p} \lambda \left( b_{\xi,\rho}^{(1)}, b_{\xi,\rho}^{(2)} \right) \\ &= \lambda b_{\xi,\rho}. \end{aligned}$$

Then, by expanding terms and applying lemma A.2 once again,

$$\begin{aligned} \sqrt{k}(\hat{\xi}_n - \xi, \hat{\sigma}_n/a(n/k) - 1) &= \sqrt{k}(\hat{\xi}_{\text{MLE}}^{(n)} - \hat{A}_n \hat{b}_n^{(1)} - \xi, \hat{\sigma}_{\text{MLE}}^{(n)}(1 - \hat{A}_n \hat{b}_n^{(2)})/a(n/k) - 1) \\ &= \sqrt{k}(\hat{\xi}_{\text{MLE}}^{(n)} - \xi, \hat{\sigma}_{\text{MLE}}^{(n)}/a(n/k) - 1) - \sqrt{k}\hat{A}_n \left( \hat{b}_n^{(1)}, \frac{\hat{\sigma}_{\text{MLE}}^{(n)}}{a(n/k)} \hat{b}_n^{(2)} \right) \\ &\xrightarrow{d} N(\lambda b_{\xi,\rho}, \Sigma) - \lambda b_{\xi,\rho} \\ &= N(0, \Sigma). \end{aligned}$$

□

### A.3 PROOF OF THEOREM 4.3

We first give the delta method, which can be found in, for example, Rémillard [2016, Appendix B.3.4.1].

**Theorem A.2** (Delta method). *Let  $\hat{\theta}_n \in \mathbb{R}^m$  be a random vector based on a sample of size  $n$ . Suppose that  $h : \mathbb{R}^m \mapsto \mathbb{R}$  is such that for  $i = 1, \dots, m$ ,  $\frac{\partial h}{\partial \theta_i}$  exists and is continuous in a neighborhood of  $\theta$ . If  $\sqrt{n}(\hat{\theta}_n - \theta) \xrightarrow{d} N(0, V)$ , then*

$$\sqrt{n}(h(\hat{\theta}_n) - h(\theta)) \xrightarrow{d} N(0, \nabla h(\theta)^\top V \nabla h(\theta)),$$

where  $\nabla h(\theta)$  is the gradient of  $h$  evaluated at  $\theta$ .

Next, we prove some useful lemmas which will be used in the proof of theorem 5.1.

**Lemma A.3.** *Let  $X_1, \dots, X_n$  be an i.i.d. sample with common cdf  $F$ , and suppose  $k = k_n \rightarrow \infty$  and  $k/n \rightarrow 0$  as  $n \rightarrow \infty$ . With  $u = X_{(n-k, n)}$  and  $\xi \in \mathbb{R}$ ,*

$$\sqrt{k} \left( (k\tau_u/n)^\xi - 1 \right) \xrightarrow{d} N(0, \xi^2).$$

*Proof.* Letting  $h_\xi(x) = x^{-\xi}$ ,

$$\sqrt{k} \left( (k\tau_u/n)^\xi - 1 \right) = \sqrt{k} \left( (n\bar{F}(u)/k)^{-\xi} - 1 \right) = \sqrt{k} \left( h_\xi(n\bar{F}(u)/k) - h_\xi(1) \right).$$

From Beirlant et al. [2009, Theorem 3.1], we know that  $\sqrt{k}(n\bar{F}(u)/k - 1) \xrightarrow{d} N(0, 1)$ . Hence, by theorem A.2,

$$\sqrt{k} \left( (k\tau_u/n)^\xi - 1 \right) \xrightarrow{d} N(0, h'_\xi(1) \cdot 1 \cdot h'_\xi(1)) = N(0, \xi^2).$$

□

**Corollary A.2.** *Let  $\alpha = \alpha_n = 1 - (1/\beta)k/n$  where  $\beta > 1$  is a constant not depending on  $n$ . Then,*

$$\sqrt{k}(s_{u, \alpha}^\xi - \beta^\xi) \xrightarrow{d} N(0, \xi^2 \beta^{2\xi}).$$

*Proof.*

$$s_{u, \alpha} = \bar{F}(u) \left( \frac{n}{k} \right) \frac{k}{n(1 - \alpha)} = \beta n \bar{F}(u) / k = \frac{\beta n}{k\tau_u},$$

and so

$$\sqrt{k}(s_{u, \alpha}^\xi - \beta^\xi) = \beta^\xi \sqrt{k} \left( (k\tau_u/n)^{-\xi} - 1 \right) = -\beta^\xi (n\bar{F}(u)/k)^\xi \sqrt{k} \left( (k\tau_u/n)^\xi - 1 \right). \quad (6)$$

Beirlant et al. [2009, Theorem 3.1] implies that  $n\bar{F}(u)/k \xrightarrow{p} 1$ . Hence, lemma A.3 with eq. (6) implies

$$\sqrt{k}(s_{u, \alpha}^\xi - \beta^\xi) \xrightarrow{d} N(0, \xi^2 \beta^{2\xi}).$$

□

**Lemma A.4.** *Suppose that the assumptions of theorem 4.1 hold. Then as  $n \rightarrow \infty$ ,*

$$\sqrt{k} \left( \frac{a(\tau_u)}{a(n/k)} - (k\tau_u/n)^\xi \right) = o_p(1). \quad (7)$$

*Proof.* Under assumption 2.1 and assumption 2.2, the following uniform inequality from De Haan and Ferreira [2006, Theorem 2.3.6] holds: for any  $\varepsilon, \delta > 0$  there exists  $t_0 = t_0(\varepsilon, \delta)$  such that for all  $t, tx \geq t_0$ ,

$$\left| \frac{\frac{a(tx)}{a(t)} - x^\xi}{A(t)} - \frac{x^\xi x^\rho - 1}{\rho} \right| \leq \varepsilon x^{\xi+\rho} \max(x^\delta, x^{-\delta}). \quad (8)$$

Hence, with  $t = n/k$  and  $x = k\tau_u/n$ , for any  $\varepsilon, \delta > 0$  and with large enough  $n$ ,

$$\begin{aligned}
\sqrt{k} \left( \frac{a(\tau_u)}{a(n/k)} - (k\tau_u/n)^\xi \right) &= \sqrt{k} A(n/k) \left[ \frac{\frac{a(\tau_u)}{a(n/k)} - (k\tau_u/n)^\xi}{A(n/k)} - (k\tau_u/n)^\xi \frac{(k\tau_u/n)^\rho - 1}{\rho} \right] \\
&\quad + \sqrt{k} A(n/k) (k\tau_u/n)^\xi \frac{(k\tau_u/n)^\rho - 1}{\rho} \\
&\leq \sqrt{k} A(n/k) \left| \frac{\frac{a(\tau_u)}{a(n/k)} - (k\tau_u/n)^\xi}{A(n/k)} - (k\tau_u/n)^\xi \frac{(k\tau_u/n)^\rho - 1}{\rho} \right| \\
&\quad + \sqrt{k} A(n/k) (k\tau_u/n)^\xi \frac{(k\tau_u/n)^\rho - 1}{\rho} \\
&\leq \sqrt{k} A(n/k) \varepsilon (k\tau_u/n)^{\xi+\rho} \max((k\tau_u/n)^\delta, (k\tau_u/n)^{-\delta}) \\
&\quad + \sqrt{k} A(n/k) (k\tau_u/n)^\xi \frac{(k\tau_u/n)^\rho - 1}{\rho}.
\end{aligned}$$

Since  $k\tau_u/n \xrightarrow{P} 1$  and  $\sqrt{k}A(n/k) \rightarrow \lambda < \infty$  as  $n \rightarrow \infty$  (by the assumption of theorem 4.1), and since  $\varepsilon$  can be made arbitrarily small as  $n \rightarrow \infty$ , both terms tend to 0 in probability as  $n \rightarrow \infty$ , hence eq. (7) follows.  $\square$

The following corollary is an immediate result by combining lemma A.3 and lemma A.4.

**Corollary A.3.** *Suppose that the assumptions of theorem 4.1 hold. Then,*

$$\sqrt{k} \left( \frac{a(\tau_u)}{a(n/k)} - 1 \right) \xrightarrow{d} N(0, \xi^2).$$

**Proof of Theorem 4.3.** With  $\alpha = 1 - (1/\beta)k/n$  and  $u = X_{(n-k,n)}$ ,

$$\frac{\hat{c}_\alpha^{(n)}}{a(n/k)} = \frac{\hat{\sigma}_n/a(n/k)}{1 - \hat{\xi}_n} \left( 1 + \frac{\beta \hat{\xi}_n - 1}{\hat{\xi}_n} \right) + \frac{u}{a(n/k)} = d_\beta(\hat{\xi}_n, \hat{\sigma}_n/a(n/k)) + \frac{u}{a(n/k)},$$

and recalling that  $s_{u,\alpha} = \bar{F}(u)/(1 - \alpha)$ ,

$$\begin{aligned}
\frac{c_{u,\alpha}}{a(n/k)} &= \frac{\sigma(u)/a(n/k)}{1 - \xi} \left( 1 + \frac{s_{u,\alpha}^\xi - 1}{\xi} \right) + \frac{u}{a(n/k)} \\
&= \frac{1}{1 - \xi} \left( 1 + \frac{s_{u,\alpha}^\xi - 1}{\xi} \right) + \frac{\sigma(u)/a(n/k) - 1}{1 - \xi} \left( 1 + \frac{s_{u,\alpha}^\xi - 1}{\xi} \right) + \frac{u}{a(n/k)}.
\end{aligned}$$

Then for the first term,

$$\begin{aligned}
\frac{1}{1 - \xi} \left( 1 + \frac{s_{u,\alpha}^\xi - 1}{\xi} \right) &= \frac{1}{1 - \xi} \left( 1 + \frac{s_{u,\alpha}^\xi - 1 + \beta^\xi - \beta^\xi}{\xi} \right) \\
&= \frac{1}{1 - \xi} \left( 1 + \frac{\beta^\xi - 1}{\xi} + \frac{s_{u,\alpha}^\xi - \beta^\xi}{\xi} \right) \\
&= d_\beta(\xi, 1) + \frac{s_{u,\alpha}^\xi - \beta^\xi}{\xi(1 - \xi)}.
\end{aligned}$$

Recalling that  $\sigma(u) = a(\tau_u)$  and combining the previous expressions,

$$\begin{aligned}
\frac{\sqrt{k}}{a(n/k)} \left( \hat{c}_\alpha^{(n)} - c_{u,\alpha} \right) &= \sqrt{k} \left( d_\beta(\hat{\xi}_n, \hat{\sigma}_n/a(n/k)) - d_\beta(\xi, 1) \right) \\
&\quad - \sqrt{k} \left( \frac{a(\tau_u)/a(n/k) - 1}{1 - \xi} \left( 1 + \frac{s_{u,\alpha}^\xi - 1}{\xi} \right) + \frac{s_{u,\alpha}^\xi - \beta^\xi}{\xi(1 - \xi)} \right) = S - R, \quad (9)
\end{aligned}$$

where we have denoted each term by  $S$  and  $R$ , respectively. By the delta method (theorem A.2),

$$S \xrightarrow{d} N(0, \nabla d_\beta(\xi, 1)^\top \Sigma \nabla d_\beta(\xi, 1)).$$

For the second term, let

$$P = \sqrt{k} \left( \frac{a(\tau_u)}{a(n/k)} - (k\tau_u/n)^\xi \right) \quad \text{and} \quad Q = \sqrt{k} ((k\tau_u/n)^\xi - 1).$$

Then  $\sqrt{k}(a(\tau_u)/a(n/k) - 1) = P + Q$  and from eq. (6),  $\sqrt{k}(s_{u,\alpha}^\xi - \beta^\xi) = -s_{u,\alpha}^\xi Q$ . Hence,

$$R = \frac{1}{\xi(1-\xi)} [(P+Q)(\xi + s_{u,\alpha}^\xi - 1) - s_{u,\alpha}^\xi Q] = \frac{(\xi + s_{u,\alpha}^\xi - 1)}{\xi(1-\xi)} P - \frac{Q}{\xi}.$$

corollary A.2 implies that  $s_{u,\alpha}^\xi = \beta^\xi + o_p(1)$  as  $n \rightarrow \infty$  and from lemma A.4 we know that  $P = o_p(1)$  as  $n \rightarrow \infty$ . By lemma A.3,  $Q \xrightarrow{d} N(0, \xi^2)$ , and so  $R \xrightarrow{d} N(0, 1)$ . Compared to  $S$ , the asymptotic variance of  $R$  is approximately 0, and we ignore its contribution in further calculations. Then, eq. (9) implies

$$\frac{\sqrt{k}}{a(n/k)} (\hat{c}_\alpha^{(n)} - c_{u,\alpha}) \xrightarrow{d} N(0, \nabla d_\beta(\xi, 1)^\top \Sigma \nabla d_\beta(\xi, 1)) = N(0, V),$$

where

$$\nabla d_\beta(\xi, 1) = \left[ \frac{\partial d_\beta}{\partial x}(\xi, 1), \frac{\partial d_\beta}{\partial y}(\xi, 1) \right]^\top,$$

with

$$\frac{\partial d_\beta}{\partial x}(\xi, 1) = \frac{\beta^\xi(2\xi + \xi(1-\xi)\log\beta - 1)}{\xi^2(1-\xi)^2} + \frac{1}{\xi^2}, \quad \frac{\partial d_\beta}{\partial y}(\xi, 1) = \frac{\beta^\xi + \xi - 1}{\xi(1-\xi)}.$$

□

#### A.4 PROOF OF THEOREM 5.1

We first prove the following lemma, which shows that when  $\tau_u$  is replaced by  $n/k$  in theorem 3.1, the asymptotic behaviour of  $\epsilon_{u,\alpha}$  is the same (in probability).

**Lemma A.5.** *Suppose that the assumptions of theorem 4.1 hold. Let  $\alpha = 1 - (1/\beta)k/n$  where  $\beta > 1$  is a constant not depending on  $n$ . Then,*

$$\frac{\epsilon_{u,\alpha}}{a(n/k)A(n/k)K_{\xi,\rho}(\beta)} \xrightarrow{p} 1.$$

*Proof.* We follow the same line of reasoning as in the proof of theorem 3.1. First, we have

$$\begin{aligned} q_{u,\alpha} &= u + \frac{\sigma(u)}{\xi} (s_{u,\alpha}^\xi - 1) \\ &= U(\tau_u) + \frac{a(\tau_u)}{\xi} (s_{u,\alpha}^\xi - 1) \\ &= U(n/k) + \frac{a(n/k)}{\xi} (\beta^\xi - 1) + U(\tau_u) - U(n/k) + \frac{1}{\xi} [a(\tau_u)(s_{u,\alpha}^\xi - 1) - a(n/k)(\beta^\xi - 1)] \\ &= U(n/k) + \frac{a(n/k)}{\xi} (\beta^\xi - 1) + U(\tau_u) - U(n/k) \\ &\quad + \frac{1}{\xi} [a(\tau_u)(s_{u,\alpha}^\xi - \beta^\xi) + (a(\tau_u) - a(n/k))(\beta^\xi - 1)]. \end{aligned}$$

Given that  $q_\alpha = U(1/(1-\alpha)) = U(n\beta/k)$ ,

$$\begin{aligned} \frac{q_\alpha - q_{u,\alpha}}{a(n/k)A(n/k)} &= \frac{\frac{U(n\beta/k) - U(n/k)}{a(n/k)} - \frac{\beta^\xi - 1}{\xi}}{A(n/k)} \\ &\quad - \frac{U(\tau_u) - U(n/k)}{a(n/k)A(n/k)} - \frac{a(\tau_u)(s_{u,\alpha}^\xi - \beta^\xi)}{\xi a(n/k)A(n/k)} - \left( \frac{a(\tau_u)}{a(n/k)} - 1 \right) \frac{\beta^\xi - 1}{\xi A(n/k)} \\ &= I - II - III - IV. \end{aligned}$$

In what follows, terms  $I-IV$  will be analyzed separately then finally combined.

$I$ : By corollary A.1, with  $t = n/k$  and  $x = \beta$  we know that term  $I$  tends to  $I_{\xi,\rho}(\beta)$  as  $n \rightarrow \infty$ .

$II$ : Under assumption 2.1 and assumption 2.2, the following uniform inequality from De Haan and Ferreira [2006, Theorem 2.3.6] holds: for any  $\varepsilon, \delta > 0$  there exists  $t_0 = t_0(\varepsilon, \delta)$  such that for all  $t, tx \geq t_0$ ,

$$\left| \frac{\frac{U(tx) - U(t)}{a(t)} - \frac{x^\xi - 1}{\xi}}{A(t)} - \frac{x^{\xi+\rho} - 1}{\xi + \rho} \right| \leq \varepsilon x^{\xi+\rho} \max(x^\delta, x^{-\delta}). \quad (10)$$

We can write  $II$  as

$$II = \frac{\frac{U(\tau_u) - U(n/k)}{a(n/k)} - \frac{(k\tau_u/n)^\xi - 1}{\xi}}{A(n/k)} + \frac{(k\tau_u/n)^\xi - 1}{\xi A(n/k)}.$$

Hence, with  $t = n/k$  and  $x = k\tau_u/n$ , the first term tends to 0 in probability using eq. (10) and essentially the same arguments as in the proof of lemma A.4. So, by the assumption of theorem 4.1 that  $\sqrt{k}A(n/k) \rightarrow \lambda < \infty$  as  $n \rightarrow \infty$  and lemma A.3,

$$II = \frac{Q}{\xi\sqrt{k}A(n/k)} + o_p(1) = \frac{Z}{\lambda} + o_p(1), \quad n \rightarrow \infty,$$

where  $Q = \sqrt{k}((k\tau_u/n)^\xi - 1)$  and  $Z$  denotes a standard normal random variable.

$III$ : corollary A.3 implies that  $a(\tau_u)/a(n/k) \xrightarrow{P} 1$  and by eq. (6),  $s_{u,\alpha}^\xi - \beta^\xi = -s_{u,\alpha}^\xi Q/\sqrt{k}$ . Corollary A.2 implies that  $s_{u,\alpha}^\xi \xrightarrow{P} \beta^\xi$ , and so

$$III = \frac{a(\tau_u)(s_{u,\alpha}^\xi - \beta^\xi)}{\xi a(n/k)A(n/k)} = \frac{-s_{u,\alpha}^\xi Q}{\xi\sqrt{k}A(n/k)}(1 + o_p(1)) = -\frac{\beta^\xi}{\lambda}Z + o_p(1), \quad n \rightarrow \infty.$$

$IV$ : With  $P = \sqrt{k}\left(\frac{a(\tau_u)}{a(n/k)} - (k\tau_u/n)^\xi\right)$  and applying lemma A.4,

$$IV = \left( \frac{a(\tau_u)}{a(n/k)} - 1 \right) \frac{\beta^\xi - 1}{\xi A(n/k)} = (P + Q) \frac{\beta^\xi - 1}{\xi\sqrt{k}A(n/k)} = \frac{\beta^\xi - 1}{\lambda}Z + o_p(1), \quad n \rightarrow \infty.$$

Now combining all terms, as  $n \rightarrow \infty$ ,

$$\begin{aligned} \frac{q_\alpha - q_{u,\alpha}}{a(n/k)A(n/k)} &= I - II - III - IV \\ &= I_{\xi,\rho}(\beta) - \frac{Z}{\lambda} + \frac{\beta^\xi}{\lambda}Z - \frac{\beta^\xi - 1}{\lambda}Z + o_p(1) = I_{\xi,\rho}(\beta) + o_p(1), \quad n \rightarrow \infty. \end{aligned}$$

Hence, following the same reasoning as in the proof of theorem 3.1,

$$\begin{aligned} \frac{\epsilon_{u,\alpha}}{a(n/k)A(n/k)} &= \frac{c_{u,\alpha} - c_\alpha}{a(n/k)A(n/k)} \\ &= -\frac{1}{1-\alpha} \int_\alpha^1 \frac{q_\gamma - q_{u,\gamma}}{a(n/k)A(n/k)} d\gamma \xrightarrow{P} -\beta \int_\beta^\infty \frac{I_{\xi,\rho}(x)}{x^2} dx = K_{\xi,\rho}(\beta). \end{aligned}$$

□

**Proof of Theorem 5.1.** First,

$$\hat{c}_{\epsilon,\alpha}^{(n)} - c_\alpha = \hat{c}_\alpha^{(n)} - \hat{\epsilon}_\alpha^{(n)} - c_\alpha = \hat{c}_\alpha^{(n)} - c_{u,\alpha} - \hat{\epsilon}_\alpha^{(n)} + c_{u,\alpha} - c_\alpha = \hat{c}_\alpha^{(n)} - c_{u,\alpha} - \hat{\epsilon}_\alpha^{(n)} + \epsilon_{u,\alpha}.$$

Hence,

$$\frac{\sqrt{k}(\hat{c}_{\epsilon,\alpha}^{(n)} - c_\alpha)}{\hat{\sigma}_n} = \frac{\sqrt{k}(\hat{c}_\alpha^{(n)} - c_{u,\alpha})}{\hat{\sigma}_n} - \frac{\sqrt{k}(\hat{\epsilon}_\alpha^{(n)} - \epsilon_{u,\alpha})}{\hat{\sigma}_n}. \quad (11)$$

For the first term on the right-hand side of eq. (11),

$$\frac{\sqrt{k}(\hat{c}_\alpha^{(n)} - c_{u,\alpha})}{\hat{\sigma}_n} = \frac{a(n/k)}{\hat{\sigma}_n} \frac{\sqrt{k}(\hat{c}_\alpha^{(n)} - c_{u,\alpha})}{a(n/k)} \xrightarrow{d} N(0, V), \quad (12)$$

which follows from theorem 5.1 and applying lemma A.2 with the fact that  $\hat{\sigma}_n/a(n/k) \xrightarrow{p} 1$ .

For the second term, first recall that

$$\frac{\hat{\epsilon}_\alpha^{(n)}}{a(n/k)A(n/k)} = \frac{\hat{\sigma}_n \hat{A}_n \hat{K}_n}{a(n/k)A(n/k)} \xrightarrow{p} K_{\xi,\rho}(\beta),$$

which follows from lemma A.2 and the continuous mapping theorem. Then, under the assumption that  $\sqrt{k}A(n/k) \rightarrow \lambda < \infty$  ( $n \rightarrow \infty$ ), it follows from lemma A.2 and lemma A.5 that

$$\begin{aligned} \frac{\sqrt{k}(\hat{\epsilon}_\alpha^{(n)} - \epsilon_{u,\alpha})}{\hat{\sigma}_n} &= \frac{a(n/k)\sqrt{k}A(n/k)}{\hat{\sigma}_n} \left( \frac{\hat{\epsilon}_\alpha^{(n)} - \epsilon_{u,\alpha}}{a(n/k)A(n/k)} \right) \\ &= \lambda(1 + o_p(1)) (K_{\xi,\rho}(\beta) - K_{\xi,\rho}(\beta) + o_p(1)) = o_p(1), \quad n \rightarrow \infty. \end{aligned} \quad (13)$$

Combining the convergence in eq. (12) and eq. (13) with eq. (11), it follows that

$$\frac{\sqrt{k}(\hat{c}_{\epsilon,\alpha}^{(n)} - c_\alpha)}{\hat{\sigma}_n} \xrightarrow{d} N(0, V),$$

and hence,

$$\frac{\sqrt{k}(\hat{c}_{\epsilon,\alpha}^{(n)} - c_\alpha)}{\hat{\sigma}_n \sqrt{\hat{V}_n}} = \frac{\sqrt{k}(\hat{c}_{\epsilon,\alpha}^{(n)} - c_\alpha)}{\hat{\sigma}_n \sqrt{V}} \frac{\sqrt{V}}{\sqrt{\hat{V}_n}} \xrightarrow{d} N(0, 1),$$

which follows from the fact that  $\hat{V}_n \xrightarrow{p} V$  (from the continuous mapping theorem) and lemma A.2.  $\square$

## A.5 CONSISTENCY OF $A(n/k)$ ESTIMATOR

In Haouas et al. [2018], an estimator for  $A_0(n/k)$  is given,<sup>1</sup> where the function  $A_0$  satisfies the second-order condition of De Haan and Ferreira [2006, Theorem 2.3.9], where for all  $x > 0$ ,

$$\lim_{t \rightarrow \infty} \frac{\frac{U(tx)}{U(t)} - x^\xi}{A_0(t)} = x^\xi \frac{x^\rho - 1}{\rho}. \quad (14)$$

Note that under assumption 2.1 and assumption 2.2, eq. (14) is satisfied. The relation between the function  $A$  defined in eq. (6) and  $A_0$  is given in De Haan and Ferreira [2006, Table 3.1], where

$$A = \frac{\xi + \rho}{\xi} A_0. \quad (15)$$

We shall use this relation and an estimator for  $A_0(n/k)$  to derive an estimator for  $A(n/k)$ . To prove consistency of the forthcoming estimator, we start with the following relation from Haouas et al. [2018]:

$$\lim_{t \rightarrow \infty} \frac{A_0(t)}{R(t)} = 1, \quad (16)$$

<sup>1</sup>The results of Haouas et al. [2018] are presented in the truncated data setting, where for a sample  $(X_i, Y_i)$ ,  $i = 1, \dots, n$  from a couple of independent random variables  $(X, Y)$ ,  $X_i$  is only observed when  $X_i \leq Y_i$ . Their results can be adapted to the non-truncation setting by assuming that  $\mathbb{P}(X \leq Y) = 1$ .



where

$$R(t) = \frac{(1 - \rho^2)(M^{(2)}(t) - 2(M^{(1)}(t))^2)}{2\rho M^{(1)}(t)}, \quad M^{(j)}(t) = t \int_{U(t)}^{\infty} \log^j(x/U(t)) dF(x).$$

This leads to an estimator for  $A_0(n/k)$  Haouas et al. [2018, p. 7],

$$\hat{A}_0^{(n)} = \frac{(1 - \hat{\rho}_n^2)(\hat{M}_n^{(2)} - 2(\hat{M}_n^{(1)})^2)}{2\hat{\rho}_n \hat{M}_n^{(1)}},$$

where  $\hat{M}_n^{(j)}$  is an estimator for  $M^{(j)}(n/k)$ , given by

$$\hat{M}_n^{(j)} = \frac{1}{k} \sum_{i=1}^k [\log X_{(n-i+1, k)} - \log X_{(n-k, n)}]^j,$$

which is also given in section 4. Note that  $\hat{M}_n^{(1)}$  is the well-known Hill estimator of  $\xi$ .  $\hat{M}_n^{(j)}$  is consistent for  $j = 1, 2$  under the conditions of the following lemma.

**Lemma A.6.** *Suppose that assumption 2.1 holds. If  $k = k_n \rightarrow \infty$ ,  $k/n \rightarrow 0$  as  $n \rightarrow \infty$ , then*

$$\frac{\hat{M}_n^{(j)}}{M^{(j)}(n/k)} \xrightarrow{p} 1, \quad j = 1, 2.$$

*Proof.* From Haouas et al. [2018, equation 1.9],

$$M^{(1)}(t) \rightarrow \xi \quad \text{and} \quad M^{(2)}(t) \rightarrow 2\xi^2, \quad t \rightarrow \infty.$$

By De Haan and Ferreira [2006, Theorem 3.2.2],  $\hat{M}_n^{(1)} \xrightarrow{p} \xi$ , and by De Haan and Ferreira [2006, Equation 3.5.7],  $\hat{M}_n^{(2)} \xrightarrow{p} 2\xi^2$ . Hence, by lemma A.2,

$$\frac{\hat{M}_n^{(1)}}{M^{(1)}(n/k)} \rightarrow 1 \quad \text{and} \quad \frac{\hat{M}_n^{(2)}}{M^{(2)}(n/k)} \rightarrow 1, \quad n \rightarrow \infty.$$

□

From eq. (15), an estimator for  $A(n/k)$  is

$$\hat{A}_n \triangleq \frac{(\hat{\xi}_{\text{MLE}}^{(n)} + \hat{\rho}_n)(1 - \hat{\rho}_n)^2(\hat{M}_n^{(2)} - 2(\hat{M}_n^{(1)})^2)}{2\hat{\xi}_{\text{MLE}}^{(n)} \hat{\rho}_n \hat{M}_n^{(1)}},$$

which is consistent under the conditions of the following lemma.

**Lemma A.7.** *Suppose that the assumptions of theorem 4.1 hold. If  $\hat{\rho}_n \xrightarrow{p} \rho$ ,*

$$\frac{\hat{A}_n}{A(n/k)} \xrightarrow{p} 1.$$

*Proof.* By theorem 4.1,  $\hat{\xi}_{\text{MLE}}^{(n)} \xrightarrow{p} \xi$ , and so by eq. (16) and eq. (15),

$$\frac{\hat{A}_n}{A(n/k)} = \frac{\hat{\xi}_{\text{MLE}}^{(n)} + \hat{\rho}_n}{\hat{\xi}_{\text{MLE}}^{(n)}} \cdot \frac{\xi}{\xi + \rho} \cdot \frac{\hat{A}_0^{(n)}}{A_0(n/k)} = (1 + o_p(1)) \frac{\hat{A}_0^{(n)} R(n/k)}{R(n/k) A_0(n/k)} = (1 + o_p(1)) \frac{\hat{A}_0^{(n)}}{R(n/k)},$$

as  $n \rightarrow \infty$ . By lemma A.6,

$$\begin{aligned} \frac{\hat{A}_0^{(n)}}{R(n/k)} &= \frac{\rho(1 - \hat{\rho}_n^2)M^{(1)}(n/k)}{\hat{\rho}_n(1 - \rho^2)\hat{M}_n^{(1)}} \cdot \frac{\hat{M}_n^{(2)} - 2(\hat{M}_n^{(1)})^2}{M^{(2)}(n/k) - 2(M^{(1)}(n/k))^2} \\ &= (1 + o_p(1)) \frac{\hat{M}_n^{(2)} - 2(\hat{M}_n^{(1)})^2}{M^{(2)}(n/k) - 2(M^{(1)}(n/k))^2}, \end{aligned}$$

as  $n \rightarrow \infty$ . From Gomes et al. [2002, p. 389],

$$\frac{\hat{M}_n^{(2)} - 2(\hat{M}_n^{(1)})^2}{A_0(n/k)} \xrightarrow{p} \frac{2\xi\rho}{(1-\rho)^2}.$$

Hence,

$$\frac{\hat{M}_n^{(2)} - 2(\hat{M}_n^{(1)})^2}{M^{(2)}(n/k) - 2(M^{(1)}(n/k))^2} = (1 + o_p(1)) \frac{2\xi\rho}{(1-\rho)^2} \cdot \frac{A_0(n/k)}{M^{(2)}(n/k) - 2(M^{(1)}(n/k))^2}, \quad n \rightarrow \infty.$$

Finally, combining eq. (16) with the fact that  $M^{(1)}(n/k) \rightarrow \xi$  as  $n \rightarrow \infty$ ,

$$\frac{A_0(n/k)}{M^{(2)}(n/k) - 2(M^{(1)}(n/k))^2} = (1 + o(1)) \frac{(1-\rho)^2}{2\rho M^{(1)}(n/k)} = (1 + o(1)) \frac{(1-\rho)^2}{2\rho\xi}, \quad n \rightarrow \infty,$$

and thus

$$\frac{\hat{M}_n^{(2)} - 2(\hat{M}_n^{(1)})^2}{M^{(2)}(n/k) - 2(M^{(1)}(n/k))^2} \xrightarrow{p} 1 \quad \text{which implies} \quad \frac{\hat{A}_n}{A(n/k)} \xrightarrow{p} 1.$$

□

## B ESTIMATION ALGORITHMS

### B.1 ADAPTIVE $\rho$ ESTIMATION

The  $\rho$  estimator given in section 4,

$$\hat{\rho}_n = \frac{3(T_n^{(\tau)}(m) - 1)}{T_n^{(\tau)}(m) - 3},$$

requires the choice of two parameters: a sample fraction  $m$ , and tuning parameter  $\tau$ . Depending on the underlying distribution, the reliability of  $\hat{\rho}_n$  can be very sensitive to the choice  $m$  and  $\tau$ . The adaptive algorithm of [Caeiro and Gomes, 2015, Section 4.1] provides an automated way to select these parameters. We present a slightly modified version of their algorithm here, which we use in our experiments.

---

**Algorithm 1:** Adaptive algorithm for  $\rho$  estimation (ADARHO)

---

**Input:** An i.i.d. sample  $X_1, \dots, X_n$ , test parameters  $\tau_1, \dots, \tau_q$ , test sample fractions  $m_1, \dots, m_r$ , precision  $p$ .

**Output:**  $\hat{\rho}_n$

```

1 for  $i = 1, \dots, q$  do
2   for  $j = 1, \dots, r$  do
3     Compute  $\hat{\rho}_n^{(\tau_i)}(m_j)$  using eq. (12), rounded to  $p$  decimal places
4   end
5   Set  $m_{\min}^{(\tau_i)}, m_{\max}^{(\tau_i)}$  to be the minimum and maximum  $m$  values associated with the longest run of consecutive
   equal  $\hat{\rho}_n^{(\tau_i)}$  values
6   Set  $l^{(\tau_i)} = m_{\max}^{(\tau_i)} - m_{\min}^{(\tau_i)} + 1$ , the length of the largest run
7 end
8 Set  $k = \arg \max_{i=1, \dots, q} l^{(\tau_i)}$ 
9 Set  $\hat{\rho}_n$  to the median of  $\hat{\rho}_n^{(\tau_k)}(m_{\min}^{(\tau_k)}), \hat{\rho}_n^{(\tau_k)}(m_{\min}^{(\tau_k)} + 1), \dots, \hat{\rho}_n^{(\tau_k)}(m_{\max}^{(\tau_k)})$ 

```

---

### B.2 AUTOMATED THRESHOLD SELECTION

The method of Bader et al. [2018] is as follows. Consider a fixed set of thresholds  $u_1 < \dots < u_l$ , where for each  $u_i$  we have  $k_i$  excesses. The sequence of null hypotheses for each respective test  $i$ ,  $i = 1, \dots, l$ , is given by

$$H_0^{(i)} : \quad \text{The distribution of the } k_i \text{ excesses above } u_i \text{ follows the GPD.}$$

For each threshold  $u_i$ , let  $\hat{\theta}_i = (\hat{\xi}_{u_i}^{(n)}, \hat{\sigma}_{u_i}^{(n)})$  denote the MLEs computed from the  $k_i$  excesses above  $u_i$ . The Anderson-Darling (AD) test statistic comparing the empirical threshold excesses distribution with the GPD is then calculated. Let  $y_{(1)} < \dots < y_{(k_i)}$  denote the ordered threshold excesses for test  $i$ , and apply the transformation  $z_{(j)} = G_{\hat{\theta}_i}(y_{(j)})$ ,  $j = 1, \dots, k_i$ , where  $G$  denotes the cdf of the GPD. The AD statistic for test  $i$  is then

$$A_i^2 = -k_i - \frac{1}{k_i} \sum_{j=1}^{k_i} (2j-1) [\log(z_{(j)}) + \log(1 - z_{(k_i+1-j)})]. \quad (17)$$

Corresponding  $p$ -values for each test statistic can then be found by referring to a lookup table (e.g., Choulakian and Stephens [2001]) or computed on-the-fly. Using the  $p$ -values  $p_1, \dots, p_l$  calculated for each test, the ForwardStop rule of G'Sell et al. [2016] is used to choose the threshold. This is done by calculating

$$\hat{w}_F = \max \left\{ w \in I \mid -\frac{1}{w} \sum_{i=1}^w \log(1 - p_i) \leq \gamma \right\}, \quad (18)$$

where  $\gamma$  is a chosen significance parameter and  $I \subseteq \{1, \dots, l\}$ ,  $I \neq \emptyset$ . Under this rule, the threshold  $u_v$  is chosen, where  $v = \min\{w \in I \mid w > \hat{w}_F\}$ . If no  $\hat{w}_F$  exists, then no rejection is made and  $u_{\min(I)}$  is chosen. If  $\hat{w}_F = \max(I)$ , then  $u_{\max(I)}$  is chosen. The overall procedure is summarized in Algorithm 2.

**Remark B.1.** In the threshold selection procedure of Bader et al. [2018],  $\hat{w}_F$  is given with  $I = \{1, \dots, l\}$ , but we make the modification that  $I$  is an arbitrary index set in view of CVaR estimation: since  $c_{u,\alpha}$  tends to infinity when  $\xi$  tends to 1, in order to ensure reasonable estimates of the CVaR we use a cutoff parameter  $\xi_{max} < 1$ , where the MLE  $\hat{\xi}_{u_i}^{(n)}$  and corresponding threshold  $u_i$  are discarded if  $\hat{\xi}_{u_i}^{(n)} > \xi_{max}$ .

**Remark B.2.** Instead of choosing the candidate thresholds  $u_1, \dots, u_l$  directly, it is usually more convenient to choose threshold percentiles  $q_1, \dots, q_l$  and compute  $u$  values via the empirical quantile function, i.e.,  $u_i = \hat{F}_n^{-1}(q_i)$ .

---

**Algorithm 2:** Automated threshold selection (AUTOTHRESH)

---

**Input:** An i.i.d. sample  $X_1, \dots, X_n$ , significance parameter  $\gamma$ , threshold percentiles  $0 < q_1, \dots, q_l < 1$ , cutoff  $\xi_{max} < 1$ .

**Output:**  $(\hat{\xi}_{MLE}^{(n)}, \hat{\sigma}_{MLE}^{(n)})$ ,  $u$  if  $I \neq \emptyset$ , otherwise return NaN

```

1   $I \leftarrow \emptyset$ 
2  for  $i = 1, \dots, l$  do
3      Set  $u_i = \hat{F}_n^{-1}(q_i)$ 
4      Compute  $(\hat{\xi}_{u_i}^{(n)}, \hat{\sigma}_{u_i}^{(n)})$  from  $k_i$  threshold excesses using maximum likelihood
5      if  $\hat{\xi}_{u_i}^{(n)} \leq \xi_{max}$  then
6          Compute  $A_i^2$  using eq. (17)
7          Set  $p_i$  to  $p$ -value for  $A_i^2$  using lookup table
8           $I \leftarrow I \cup \{i\}$ 
9      end
10 end
11 if  $I \neq \emptyset$  then
12     Set  $W = \{w \in I \mid -\frac{1}{w} \sum_{i=1}^w \log(1 - p_i) \leq \gamma\}$ 
13     if  $W \neq \emptyset$  then
14         Compute  $\hat{w}_F$  using eq. (18)
15         if  $\hat{w}_F = \max(I)$  then
16              $v \leftarrow \max(I)$ 
17         else
18              $v \leftarrow \min\{w \in I \mid w > \hat{w}_F\}$ 
19         end
20     else
21          $v \leftarrow \min(I)$ 
22     end
23      $u \leftarrow u_v$ 
24      $(\hat{\xi}_{MLE}^{(n)}, \hat{\sigma}_{MLE}^{(n)}) \leftarrow (\hat{\xi}_{u_v}^{(n)}, \hat{\sigma}_{u_v}^{(n)})$ 
25 end

```

---

### B.3 ALGORITHM TO COMPUTE THE UNBIASED POT ESTIMATOR

This section provides the algorithm used to compute UPOT in its entirety, which makes use of both algorithm 1 and algorithm 2. In our experiments, we set  $\tau_1 = -1.5, \tau_2 = -1.25, \dots, \tau_{13} = 1.5, m_1 = 100, m_2 = 200, \dots, m_r = n - 1, p = 1$  in algorithm 1, and  $\gamma = 0.1, q_1 = 0.79, q_2 = 0.80, \dots, q_{20} = 0.98, \xi_{max} = 0.9$  in algorithm 2. Assume these choices of values in the following algorithm.

---

**Algorithm 3:** Unbiased peaks-over-threshold CVaR estimator (UPOT)

---

**Input:** An i.i.d. sample  $X_1, \dots, X_n$ , confidence level  $\alpha$

**Output:**  $\hat{c}_{\epsilon, \alpha}^{(n)}$

```

1  $\mathbf{x} \leftarrow \text{AUTOTHRESH}(X_1, \dots, X_n)$ 
2 if  $\mathbf{x}$  is not NaN then
3    $(\hat{\xi}_{\text{MLE}}^{(n)}, \hat{\sigma}_{\text{MLE}}^{(n)}), u \leftarrow \mathbf{x}$ 
4    $\hat{\rho}_n \leftarrow \text{ADARHO}(X_1, \dots, X_n)$ 
5   Compute  $\hat{b}_n$  using eq. (14)
6   Compute  $\hat{A}_n$  using eq. (13) and the  $k$  threshold excesses above  $u$ 
7    $(\hat{\xi}_n, \hat{\sigma}_n) \leftarrow (\hat{\xi}_{\text{MLE}}^{(n)} - \hat{A}_n \hat{b}_n^{(1)}, \hat{\sigma}_{\text{MLE}}^{(n)}(1 - \hat{A}_n \hat{b}_n^{(2)}))$ 
8   Compute  $\hat{e}_{\alpha}^{(n)}$  using eq. (18)
9   Compute  $\hat{c}_{\alpha}^{(n)}$  using eq. (16)
10   $\hat{c}_{\epsilon, \alpha}^{(n)} \leftarrow \hat{c}_{\alpha}^{(n)} - \hat{e}_{\alpha}^{(n)}$ 
11 end
```

---

**Remark B.3.** It may happen that Algorithm 3 fails if AUTOTHRESH returns NaN, in which case no suitable estimates of  $\xi$  are found. This is an indication that the underlying data distribution does not satisfy the condition  $\xi < 1$  and the CVaR does not exist. To make Algorithm 3 robust, the sample average estimate is used as a fallback when the latter occurs. We report the failure rate of UPOT during experiments in table 1.

## C EXAMPLES OF HEAVY-TAILED DISTRIBUTIONS

### C.1 BURR

The Burr distribution with parameters  $c, d$  has cdf given by

$$F_{c,d}(x) = 1 - (1 + x^c)^{-d}, \quad c, d, x > 0.$$

The CVaR for the Burr distribution can be derived from its expression for the conditional moment given in Kumar [2017, Section 2.2]. If  $X \sim \text{Burr}(c, d)$ ,

$$\text{CVaR}_{\alpha}(X) = \frac{d[(1/q_{\alpha})^c]^{d-1/c}}{(1-\alpha)(d-1/c)} {}_2F_1\left(d - \frac{1}{c}, 1 + d, d - \frac{1}{c} + 1; -\frac{1}{q_{\alpha}}\right), \quad cd > 1, \quad (19)$$

where  ${}_2F_1$  denotes the hypergeometric function and  $q_{\alpha} = F_{c,d}^{-1}(\alpha)$ . Values of  $\xi, \rho$  and functions  $a$  and  $A$  are given by

$$\xi = \frac{1}{cd}, \quad \rho = -\frac{1}{d}, \quad a(t) = \frac{t^{1/d}}{cd} \left(t^{1/d} - 1\right)^{1/c-1}, \quad A(t) = \frac{1-c}{cd(t^{1/d} - 1)},$$

where  $a$  and  $A$  are defined for  $t \geq 1$ .

### C.2 FRÉCHET

The Fréchet distribution with parameter  $\gamma$  has cdf given by

$$F_{\gamma}(x) = e^{-x^{-\gamma}}, \quad \gamma, x > 0.$$

If  $X \sim \text{Fréchet}(\gamma)$ ,

$$\text{CVaR}_\alpha(X) = (1 - \alpha)^{-1} [\Gamma(\gamma - 1/\gamma) - \Gamma(\gamma - 1/\gamma, -\log(\alpha))], \quad \gamma > 1, \quad (20)$$

where  $\Gamma(\cdot)$  and  $\Gamma(\cdot, \cdot)$  denote the gamma and upper incomplete gamma functions, respectively. Values of  $\xi$ ,  $\rho$  and functions  $a$  and  $A$  are given by

$$\xi = \frac{1}{\gamma}, \quad \rho = -1, \quad a(t) = \frac{\log\left(\frac{t}{t-1}\right)^{-1-\frac{1}{\gamma}}}{\gamma(t-1)}, \quad A(t) = -\frac{1 + \gamma + \gamma t \log(1 - \frac{1}{t})}{\gamma(1-t) \log(1 - \frac{1}{t})} - \frac{1}{\gamma},$$

where  $a$  and  $A$  are defined for  $t \geq 1$ .

### C.2.1 Asymptotic variance of SA estimator for Fréchet distribution

An expression for the asymptotic variance (AVAR) of the SA estimator is given in [Trindade et al., 2007, Theorem 2]. Let  $Z$  be a continuous random variable such that  $\mathbb{E}[Z^2]$  is finite. Then, for a confidence level  $\alpha$ ,

$$\sqrt{n} \left( \text{CVaR}_\alpha(Z) - \widehat{\text{CVaR}}_{n,\alpha}(Z) \right) \xrightarrow{d} N(0, \theta^2),$$

where  $\widehat{\text{CVaR}}_{n,\alpha}(Z)$  is the SA estimator given in eq. (3) and

$$\theta^2 = \frac{\text{Var}([Z - q_\alpha]^+)}{(1 - \alpha)^2},$$

and  $[x]^+ = \max\{0, x\}$ . If  $Z \sim \text{Fréchet}(\gamma)$ , the condition that  $\mathbb{E}[Z^2]$  is finite is equivalent to  $\gamma > 2$ . By the law of total expectation,

$$\mathbb{E}[[Z - q_\alpha]^+] = \mathbb{P}(Z \leq q_\alpha) \mathbb{E}[0] + \mathbb{P}(Z > q_\alpha) \mathbb{E}[Z - q_\alpha | Z > q_\alpha] = (1 - e^{-q_\alpha^{-\gamma}}) \mathbb{E}[Z - q_\alpha | Z > q_\alpha].$$

The distribution of the conditional random variable on the right hand side has the same form as the excess distribution function, given in definition 2.4. Let

$$F_{\alpha,\gamma}(z) = \mathbb{P}(Z - q_\alpha \leq z | Z > q_\alpha) = \frac{F_\gamma(z + q_\alpha) - F_\gamma(q_\alpha)}{1 - F_\gamma(q_\alpha)} = \frac{e^{-(z+q_\alpha)^{-\gamma}} - e^{-q_\alpha^{-\gamma}}}{1 - e^{-q_\alpha^{-\gamma}}},$$

$$f_{\alpha,\gamma}(z) = F'_{\alpha,\gamma}(z) = \frac{\gamma(z + q_\alpha)^{-\gamma-1} e^{-(z+q_\alpha)^{-\gamma}}}{1 - e^{-q_\alpha^{-\gamma}}}, \quad z > 0.$$

Hence,

$$\mathbb{E}[[Z - q_\alpha]^+] = \int_0^\infty \gamma(z + q_\alpha)^{-\gamma-1} z e^{-(z+q_\alpha)^{-\gamma}} dz = \int_{q_\alpha}^\infty t^{-1/\gamma} e^{-t} dt = \Gamma(1 - 1/\gamma, q_\alpha), \quad \gamma > 1,$$

where  $t = (z + q_\alpha)^{-\gamma}$  and  $\Gamma(\cdot, \cdot)$  denotes the upper incomplete gamma function. With a similar calculation, the second moment is

$$\mathbb{E}[[Z - q_\alpha]^+{}^2] = \Gamma(1 - 2/\gamma, q_\alpha), \quad \gamma > 2.$$

Finally, we can compute the AVAR of the SA estimator for the Fréchet distribution, which is

$$\frac{\theta^2}{n} = \frac{\mathbb{E}[[Z - q_\alpha]^+{}^2] - \mathbb{E}[[Z - q_\alpha]^+]^2}{n(1 - \alpha)^2} = \frac{\Gamma(1 - 2/\gamma, q_\alpha) - \Gamma(1 - 1/\gamma, q_\alpha)^2}{n(1 - \alpha)^2}, \quad \gamma > 2.$$

### C.3 HALF-T

If  $X$  follows the  $t$  distribution with  $\nu$  degrees of freedom, then  $|X|$  follows the half- $t$  distribution, which has cdf given by

$$F_\nu(x) = 2 - \mathcal{I}_{t(x)}\left(\frac{\nu}{2}, \frac{1}{2}\right), \quad \nu > 0, x \geq 0,$$

where  $t(x) = \frac{\nu}{x^2 + \nu}$  and  $\mathcal{I}_t(a, b)$  is the regularized incomplete Beta function. The CVaR for the half- $t$  distribution can be derived from the expression for the CVaR of the  $t$ -distribution given in [Norton et al., 2019, Proposition 12]. If  $X \sim \text{half-}t(\nu)$ , then

$$\text{CVaR}_\alpha(X) = 2 \frac{\nu + q_\alpha}{(\nu - 1)(1 - \alpha)} g_\nu(q_\alpha), \quad \nu > 1,$$

where  $g_\nu$  is the probability density function of the standardized  $t$ -distribution, and  $q_\alpha = T^{-1}\left(\frac{\alpha+1}{2}\right)$  where  $T^{-1}$  is the inverse of the cdf of standardized  $t$ -distribution. The half- $t$  distribution is in  $\text{MDA}(H_\xi)$  with  $\xi = 1/\nu$ , and has  $\rho = -2/\nu$  (Caeiro and Gomes [2015, Remark 2.1]). It does not seem possible to compute closed-form expressions for the functions  $a$  and  $A$  for the half- $t$  distribution.

## D NUMERICAL RESULTS

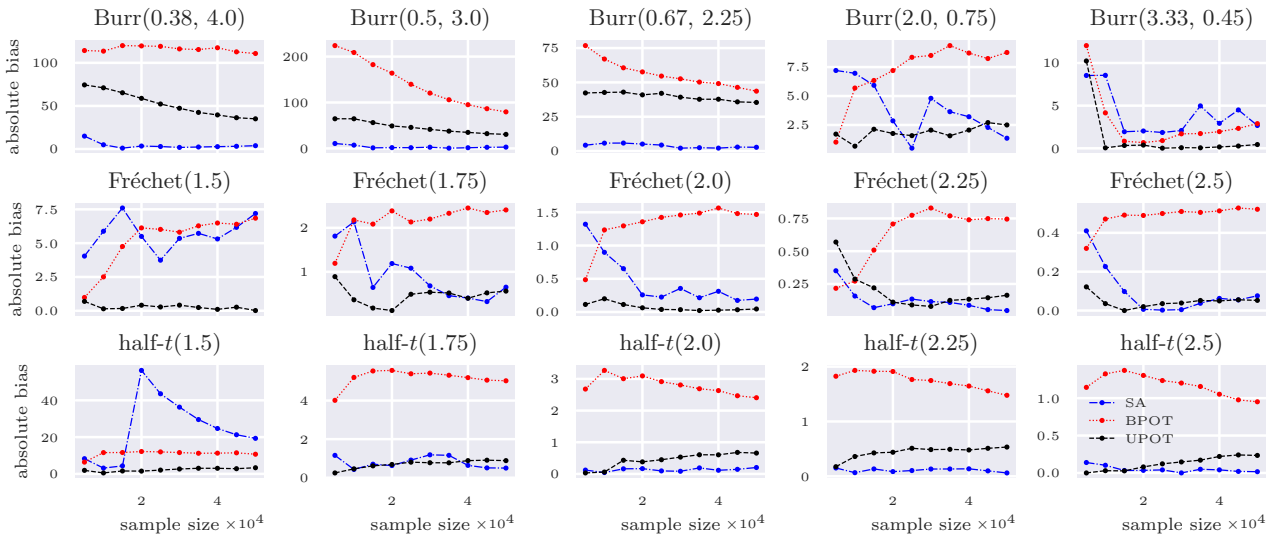

Figure 1: Absolute bias of estimating  $\text{CVaR}_{0.998}$  using UPOT (black), BPOT (red), and SA (blue).

Table 1: Data for all distributions used in experiments.  $\text{CVaR}_\alpha$  denotes the exact CVaR value for  $\alpha = 0.998$ . Given at a sample size  $n = 50000$ , UPOT, BPOT, and SA denote the average estimated CVaR values across  $N = 1000$  independent runs, and TP denotes the average threshold percentile chosen by algorithm 2. FR denotes the failure rate, the number of independent runs where algorithm 2 returned NaN, i.e., where no suitable estimate of  $\xi$  could be obtained and no CVaR estimate could be produced by the POT methods. This value is given at a sample size of  $n = 5000$  since very few failures occurred beyond this sample size. CP denotes the coverage probability achieved by our confidence interval at a sample size  $n = 50000$ .

|                  | $\text{CVaR}_\alpha$ | UPOT   | BPOT   | SA     | TP   | FR | CP   |
|------------------|----------------------|--------|--------|--------|------|----|------|
| Burr(0.38, 4.0)  | 124.87               | 89.83  | 235.70 | 121.03 | 0.96 | 2  | 0.73 |
| Burr(0.5, 3.0)   | 166.18               | 135.62 | 245.74 | 163.39 | 0.92 | 1  | 0.87 |
| Burr(0.67, 2.25) | 175.93               | 140.53 | 219.55 | 173.19 | 0.84 | 0  | 0.88 |
| Burr(2.0, 0.75)  | 188.98               | 191.48 | 180.22 | 190.34 | 0.80 | 0  | 0.94 |
| Burr(3.33, 0.45) | 190.15               | 189.71 | 187.26 | 192.83 | 0.80 | 4  | 0.95 |
| Fréchet(1.5)     | 188.96               | 188.94 | 182.11 | 181.76 | 0.80 | 4  | 0.89 |
| Fréchet(1.75)    | 81.32                | 81.88  | 78.91  | 81.97  | 0.80 | 2  | 0.93 |
| Fréchet(2.0)     | 44.71                | 44.76  | 43.25  | 44.52  | 0.80 | 1  | 0.94 |
| Fréchet(2.25)    | 28.49                | 28.66  | 27.75  | 28.45  | 0.80 | 2  | 0.95 |
| Fréchet(2.5)     | 20.02                | 20.07  | 19.49  | 19.94  | 0.80 | 1  | 0.95 |
| half- $t$ (1.5)  | 156.58               | 159.92 | 145.89 | 175.91 | 0.81 | 0  | 0.94 |
| half- $t$ (1.75) | 74.52                | 75.40  | 69.49  | 74.02  | 0.82 | 2  | 0.94 |
| half- $t$ (2.0)  | 44.70                | 45.36  | 42.29  | 44.50  | 0.83 | 0  | 0.94 |
| half- $t$ (2.25) | 30.74                | 31.27  | 29.26  | 30.68  | 0.84 | 1  | 0.95 |
| half- $t$ (2.5)  | 23.10                | 23.34  | 22.15  | 23.12  | 0.85 | 1  | 0.94 |

Table 2: Error values at sample size  $n = 50000$ .

|                  | RMSE  |        |        | Bias   |        |       |
|------------------|-------|--------|--------|--------|--------|-------|
|                  | UPOT  | BPOT   | SA     | UPOT   | BPOT   | SA    |
| Burr(0.38, 4.0)  | 48.56 | 134.15 | 64.04  | -35.03 | 110.83 | -3.84 |
| Burr(0.5, 3.0)   | 47.71 | 121.18 | 124.71 | -30.56 | 79.56  | -2.78 |
| Burr(0.67, 2.25) | 48.88 | 58.97  | 81.34  | -35.41 | 43.62  | -2.75 |
| Burr(2.0, 0.75)  | 17.48 | 22.27  | 88.48  | 2.50   | -8.76  | 1.36  |
| Burr(3.33, 0.45) | 13.83 | 19.40  | 128.88 | -0.44  | -2.89  | 2.67  |
| Fréchet(1.5)     | 19.47 | 21.31  | 69.35  | -0.02  | -6.85  | -7.19 |
| Fréchet(1.75)    | 6.10  | 7.07   | 24.25  | 0.56   | -2.41  | 0.65  |
| Fréchet(2.0)     | 2.71  | 3.36   | 7.45   | 0.05   | -1.47  | -0.20 |
| Fréchet(2.25)    | 1.50  | 1.90   | 3.21   | 0.16   | -0.75  | -0.05 |
| Fréchet(2.5)     | 0.92  | 1.18   | 1.69   | 0.05   | -0.52  | -0.08 |
| half- $t$ (1.5)  | 16.78 | 22.68  | 765.05 | 3.34   | -10.69 | 19.33 |
| half- $t$ (1.75) | 6.11  | 8.72   | 16.40  | 0.89   | -5.03  | -0.50 |
| half- $t$ (2.0)  | 3.58  | 4.92   | 7.62   | 0.66   | -2.41  | -0.20 |
| half- $t$ (2.25) | 2.07  | 2.78   | 3.49   | 0.53   | -1.48  | -0.06 |
| half- $t$ (2.5)  | 1.44  | 1.88   | 2.06   | 0.23   | -0.95  | 0.02  |

## References

Brian Bader, Jun Yan, Xuebin Zhang, et al. Automated threshold selection for extreme value analysis via ordered goodness-of-fit tests with adjustment for false discovery rate. *The Annals of Applied Statistics*, 12(1):310–329, 2018.

- Jan Beirlant, J. P. Raoult, and Rym Worms. On the relative approximation error of the generalized Pareto approximation for a high quantile. *Extremes*, 6:335–360, 2003.
- Jan Beirlant, Elisabeth Joossens, and Johan Segers. Second-order refined peaks-over-threshold modelling for heavy-tailed distributions. *Journal of Statistical Planning and Inference*, 139(8):2800 – 2815, 2009. ISSN 0378-3758. doi: <https://doi.org/10.1016/j.jspi.2009.01.006>. URL <http://www.sciencedirect.com/science/article/pii/S0378375809000068>.
- Frederico Caeiro and M. Ivette Gomes. Bias reduction in the estimation of a shape second-order parameter of a heavy-tailed model. *Journal of Statistical Computation and Simulation*, 85(17):3405–3419, 2015. doi: 10.1080/00949655.2014.975707.
- V Choulakian and M. A Stephens. Goodness-of-fit tests for the generalized Pareto distribution. *Technometrics*, 43(4): 478–484, 2001. doi: 10.1198/00401700152672573. URL <https://doi.org/10.1198/00401700152672573>.
- Laurens De Haan and Ana Ferreira. *Extreme Value Theory: An Introduction*. Springer-Verlag New York, 2006. doi: 10.1007/0-387-34471-3.
- M. Gomes, L. Haan, and L. Peng. Semi-parametric estimation of the second order parameter in statistics of extremes. *Extremes*, 5:387–414, 2002.
- Max Grazier G'Sell, Stefan Wager, Alexandra Chouldechova, and Robert Tibshirani. Sequential selection procedures and false discovery rate control. *Journal of the Royal Statistical Society Series B*, 78(2):423–444, March 2016. URL <https://ideas.repec.org/a/bla/jorssb/v78y2016i2p423-444.html>.
- Nawel Haouas, Abdelhakim Necir, and Brahim Brahimi. Estimating the second-order parameter of regular variation and bias reduction in tail index estimation under random truncation. *Journal of Statistical Theory and Practice*, 13, 10 2018.
- Devendra Kumar. The Singh–Maddala distribution: properties and estimation. *International Journal of System Assurance Engineering and Management*, 8, 03 2017. doi: 10.1007/s13198-017-0600-1.
- Matthew Norton, Valentyn Khokhlov, and Stan Uryasev. Calculating CVaR and bPOE for Common Probability Distributions With Application to Portfolio Optimization and Density Estimation. *Annals of Operations Research*, 2019. URL <https://doi.org/10.1007/s10479-019-03373-1>.
- Bruno Rémillard. *Statistical methods for financial engineering*. Chapman and Hall/CRC, 2016.
- A. Alexandre Trindade, Stan Uryasev, Alexander Shapiro, and Grigory Zrazhevsky. Financial prediction with constrained tail risk. *Journal of Banking & Finance*, 31(11):3524 – 3538, 2007. ISSN 0378-4266. doi: <https://doi.org/10.1016/j.jbankfin.2007.04.014>. URL <http://www.sciencedirect.com/science/article/pii/S0378426607001392>. Risk Management and Quantitative Approaches in Finance.
- A. W. van der Vaart. *Asymptotic Statistics*. Cambridge Series in Statistical and Probabilistic Mathematics. Cambridge University Press, 1998. doi: 10.1017/CBO9780511802256.
